# Supplementary material for: A stably discrete 31-nuclearity silver(i) thiolate nanocluster luminescent thermometer supported by DMF auxiliary ligands
Source: Royal Society of Chemistry journal article supplement (doi:10.1039/c9nj05076k), 2019-12-13
Supplement: c9nj05076k1.pdf [file c9nj05076k1.pdf]

## Supporting Information

5

### **A Stably Discrete 31-Nuclearity Silver(I) Thiolate Nanocluster Luminescent Thermometer Support by DMF Auxiliary Ligand**

10

**Yu-Hui Feng, Zhi-Sheng Lin, Si-Qing Liu, Ju-Feng Shi, Kun Zhou\*, Jiu-Yu Ji and Yan-Feng Bi\***

*School of Chemistry and Materials Science, Liaoning Shihua University, Fushun, Liaoning 113001, China. Tel/Fax: (+86) -24-56861709; E-mail: [zhouk800@aliyun.com](mailto:zhouk800@aliyun.com); [biyanfeng@lnpu.edu.cn](mailto:biyanfeng@lnpu.edu.cn)*

15

### **Table of contents**

20

|                                         |              |
|-----------------------------------------|--------------|
| <b>1. Synthetic procedures.....</b>     | <b>S2</b>    |
| <b>2. Crystallographic studies.....</b> | <b>S2-S5</b> |
| <b>3. Physical Measurements.....</b>    | <b>S6-S8</b> |

25

## 1. Synthetic procedures

**General comments:** In this paper, all reagents and solvents for synthesis were obtained from commercial sources and used without further purification, such as methanol (Aladdin, >95%), N,N-Dimethylformamide (Aladdin, >95%), dichloromethane (Aladdin, >95%). All other reagents were of analytical grade and used as received. AgS<sup>t</sup>Bu was synthesized by using Et<sub>3</sub>N as organic solvent and reacted with equivalent amounts of AgNO<sub>3</sub> with HS<sup>t</sup>Bu according to the literature.<sup>1</sup>

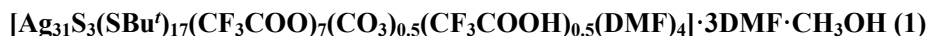

Compound **1** was obtained by one-pot synthesis, namely, AgS<sup>t</sup>Bu (0.0653 g, 0.3314 mmol) with CF<sub>3</sub>COOAg (0.0293 g, 0.1327 mmol) were dissolved in methanol - N,N-dimethylformamide (DMF) - dichloromethane (V : V : V=1 : 1 : 1) (15 mL) under stir at room temperature to gain a yellow suspension. Then the yellow suspension was uninterruptedly stirred at room temperature for 24h and then was filtered. The filtrate was evaporated slowly in air at room temperature. Compound **1** deposited as yellow block crystals. Yield: *ca.* 63% (based on Ag).

## 2. Crystallographic studies

Single-crystal X-ray diffraction data for **1** were recorded on a Bruker D8 QUEST with graphite-monochromated Mo-K $\alpha$  radiation ( $\lambda = 0.71073 \text{ \AA}$ ) at 150(2) K. Absorption corrections were applied using multi-scan technique and performed by using the SADABS program. The crystal structure was solved by means of direct methods and refined by employing full-matrix least squares on  $F^2$  (SHELXTL-2014).<sup>2</sup> Additional CH<sub>3</sub>OH solvent molecule was estimated from PLATON<sup>3</sup> squeeze and thermal gravimetric (TG) analysis and included in the molecular formula directly. CCDC-1951395 (**1**) contains the supplementary crystallographic data for this paper. These data can be obtained free of charge from the Cambridge Crystallographic Data Centre via [www.ccdc.cam.ac.uk/data\\_request/cif](http://www.ccdc.cam.ac.uk/data_request/cif) for **1**.

**Table S1.** Crystal data, data collection and structure refinement details for compound **1**

| Compound       | <b>1</b>                                                                                                                  |
|----------------|---------------------------------------------------------------------------------------------------------------------------|
| Formula*       | C <sub>104.5</sub> H <sub>202.5</sub> Ag <sub>31</sub> F <sub>22.5</sub> O <sub>23.5</sub> S <sub>20</sub> N <sub>7</sub> |
| Formula weight | 6345.895                                                                                                                  |
| Crystal system | Monoclinic                                                                                                                |
| Space group    | P 2 <sub>1</sub> /c                                                                                                       |
| <i>a</i> (Å)   | 32.5856(10)                                                                                                               |
| <i>b</i> (Å)   | 19.2715(6)                                                                                                                |
| <i>c</i> (Å)   | 29.1203(9)                                                                                                                |
| $\alpha$ (°)   | 90                                                                                                                        |
| $\beta$ (°)    | 97.5290(10)                                                                                                               |

|                           |             |
|---------------------------|-------------|
| $\gamma$ (°)              | 90          |
| V (Å <sup>3</sup> )       | 18129.1(10) |
| Z                         | 2           |
| $D_c$ /g cm <sup>-3</sup> | 2.325       |
| $\mu$ /mm <sup>-1</sup>   | 3.565       |
| $F(000)$                  | 12184       |
| Reflection collected      | 179927      |
| Unique reflections        | 43512       |
| Parameters                | 2168        |
| $R_{\text{int}}$          | 0.0474      |
| GOF                       | 1.027       |
| $R_1^a [I > 2\sigma(I)]$  | 0.0539      |
| $wR_2^b$ (all data)       | 0.1191      |

$$^a R_1 = \frac{\sum ||F_o| - |F_c||}{\sum |F_o|}; \quad ^b wR_2 = \left\{ \frac{\sum [w(F_o^2 - F_c^2)^2]}{\sum [w(F_o^2)]} \right\}^{1/2}.$$

\*The formula and  $D_c$  is not included the unidentified disordered solvents

**Table S2.** Selected bond lengths (Å) for compound **1**

|    |              |            |              |            |
|----|--------------|------------|--------------|------------|
| 5  | Ag(1)-S(1)   | 2.4123(18) | Ag(11)-S(10) | 2.608(2)   |
|    | Ag(1)-S(3)   | 2.4415(17) | Ag(11)-S(14) | 2.664(2)   |
| 10 | Ag(2)-S(1)   | 2.4678(17) | Ag(11)-S(2)  | 2.6655(19) |
|    | Ag(2)-S(2)   | 2.4719(18) | Ag(12)-S(11) | 2.407(2)   |
|    | Ag(3)-S(3)   | 2.4374(17) | Ag(12)-S(10) | 2.434(4)   |
| 15 | Ag(3)-S(2)   | 2.4402(18) | Ag(13)-O(2)  | 2.372(7)   |
|    | Ag(4)-S(9)   | 2.4713(19) | Ag(13)-S(11) | 2.479(2)   |
|    | Ag(4)-S(4)   | 2.517(2)   | Ag(13)-S(12) | 2.675(2)   |
|    | Ag(4)-S(1)   | 2.7066(18) | Ag(13)-S(1)  | 2.7715(18) |
| 20 | Ag(5)-S(5)   | 2.399(2)   | Ag(14)-S(13) | 2.4029(19) |
|    | Ag(5)-S(4)   | 2.430(2)   | Ag(14)-S(12) | 2.4146(19) |
|    | Ag(6)-S(5)   | 2.399(2)   | Ag(14)-S(1)  | 2.8072(18) |
|    | Ag(6)-S(6)   | 2.427(2)   | Ag(15)-S(13) | 2.393(2)   |
|    | Ag(7)-S(7)   | 2.487(2)   | Ag(15)-S(14) | 2.396(2)   |
| 25 | Ag(7)-O(15)  | 2.53(2)    | Ag(16)-S(15) | 2.409(2)   |
|    | Ag(7)-S(6)   | 2.548(2)   | Ag(16)-S(14) | 2.416(2)   |
|    | Ag(7)-S(2)   | 2.7043(19) | Ag(17)-S(15) | 2.407(2)   |
|    | Ag(8)-S(7)   | 2.452(2)   | Ag(17)-S(16) | 2.411(2)   |
|    | Ag(8)-S(8)   | 2.550(2)   | Ag(17)-S(2)  | 2.9429(18) |
|    | Ag(8)-S(3)   | 2.6368(18) | Ag(18)-O(4)  | 2.351(7)   |
| 30 | Ag(9)-S(9)   | 2.4650(18) | Ag(18)-S(17) | 2.449(2)   |
|    | Ag(9)-S(8)   | 2.604(2)   | Ag(18)-S(2)  | 2.5458(18) |
|    | Ag(9)-S(3)   | 2.6168(17) | Ag(19)-S(17) | 2.520(6)   |
|    | Ag(10)-O(1)  | 2.329(6)   | Ag(19)-S(10) | 2.649(3)   |
| 30 | Ag(10)-S(10) | 2.5593(19) | Ag(19)-S(18) | 2.723(8)   |
|    | Ag(10)-S(1)  | 2.5772(18) | Ag(19)-S(3)  | 2.840(3)   |
|    | Ag(11)-O(3)  | 2.348(7)   | Ag(20)-O(5)  | 2.318(8)   |

|    |              |            |    |              |           |
|----|--------------|------------|----|--------------|-----------|
|    | Ag(20)-S(20) | 2.373(2)   |    | Ag(27)-O(10) | 2.296(8)  |
|    | Ag(20)-S(8)  | 2.467(2)   |    | Ag(27)-O(19) | 2.495(8)  |
|    | Ag(21)-O(6)  | 2.371(7)   |    | Ag(27)-S(13) | 2.511(2)  |
|    | Ag(21)-S(19) | 2.391(2)   |    | Ag(27)-S(4)  | 2.588(2)  |
| 5  | Ag(21)-S(8)  | 2.479(2)   | 25 | Ag(28)-O(20) | 2.371(10) |
|    | Ag(22)-S(19) | 2.3753(19) |    | Ag(28)-O(11) | 2.377(8)  |
|    | Ag(22)-S(18) | 2.4096(19) |    | Ag(28)-S(15) | 2.478(2)  |
|    | Ag(23)-S(20) | 2.355(2)   |    | Ag(28)-S(6)  | 2.579(2)  |
|    | Ag(23)-S(18) | 2.3859(19) |    | Ag(29)-O(12) | 2.306(8)  |
| 10 | Ag(24)-O(8)  | 2.309(5)   | 30 | Ag(29)-O(21) | 2.390(9)  |
|    | Ag(24)-S(11) | 2.515(2)   |    | Ag(29)-S(16) | 2.428(2)  |
|    | Ag(24)-S(19) | 2.5692(19) |    | Ag(29)-S(6)  | 2.512(2)  |
|    | Ag(24)-S(9)  | 2.6175(18) |    | Ag(30)-O(13) | 2.332(7)  |
|    | Ag(25)-O(7)  | 2.318(5)   |    | Ag(30)-S(16) | 2.447(3)  |
| 15 | Ag(25)-S(12) | 2.4765(19) | 35 | Ag(30)-S(7)  | 2.703(6)  |
|    | Ag(25)-S(9)  | 2.5507(19) |    | Ag(30)-S(17) | 2.806(6)  |
|    | Ag(26)-O(9)  | 2.325(9)   |    | Ag(31)-O(14) | 2.335(6)  |
|    | Ag(26)-O(18) | 2.429(9)   |    | Ag(31)-S(20) | 2.480(2)  |
|    | Ag(26)-S(12) | 2.522(2)   |    | Ag(31)-S(17) | 2.620(2)  |
| 20 | Ag(26)-S(4)  | 2.523(2)   | 40 | Ag(31)-S(7)  | 2.675(2)  |

**Table S3.** All the Ag...Ag interactions (Å) for compound **1**

|    |               |            |    |               |            |
|----|---------------|------------|----|---------------|------------|
|    | Ag(1)-Ag(9)   | 2.8697(8)  |    | Ag(10)-Ag(12) | 3.046(6)   |
| 45 | Ag(1)-Ag(3)   | 2.8993(7)  | 70 | Ag(10)-Ag(11) | 3.1009(8)  |
|    | Ag(1)-Ag(12)  | 2.9063(17) |    | Ag(10)-Ag(15) | 3.3133(9)  |
|    | Ag(1)-Ag(2)   | 2.9079(7)  |    | Ag(11)-Ag(18) | 2.9434(10) |
|    | Ag(1)-Ag(10)  | 3.0957(8)  |    | Ag(11)-Ag(16) | 3.0802(10) |
|    | Ag(1)-Ag(4)   | 3.1343(8)  |    | Ag(12)-Ag(19) | 3.084(5)   |
| 50 | Ag(1)-Ag(13)  | 3.1926(9)  | 75 | Ag(12)-Ag(13) | 3.321(4)   |
|    | Ag(2)-Ag(3)   | 2.8762(8)  |    | Ag(13)-Ag(25) | 3.1454(9)  |
|    | Ag(2)-Ag(10)  | 3.0213(8)  |    | Ag(13)-Ag(14) | 3.3427(9)  |
|    | Ag(2)-Ag(6)   | 3.1426(8)  |    | Ag(14)-Ag(26) | 2.9474(8)  |
|    | Ag(2)-Ag(11)  | 3.1672(9)  |    | Ag(14)-Ag(27) | 3.0372(8)  |
| 55 | Ag(2)-Ag(5)   | 3.1871(9)  | 80 | Ag(14)-Ag(15) | 3.3012(9)  |
|    | Ag(3)-Ag(8)   | 2.9324(8)  |    | Ag(17)-Ag(29) | 3.0458(11) |
|    | Ag(3)-Ag(18)  | 2.9765(8)  |    | Ag(17)-Ag(18) | 3.1827(9)  |
|    | Ag(3)-Ag(19)  | 3.030(6)   |    | Ag(17)-Ag(28) | 3.1967(10) |
|    | Ag(3)-Ag(7)   | 3.0762(8)  |    | Ag(18)-Ag(30) | 2.891(7)   |
| 60 | Ag(4)-Ag(25)  | 3.0327(8)  | 85 | Ag(19)-Ag(23) | 2.966(5)   |
|    | Ag(4)-Ag(26)  | 3.2105(9)  |    | Ag(20)-Ag(21) | 2.8875(9)  |
|    | Ag(5)-Ag(27)  | 3.0750(9)  |    | Ag(22)-Ag(23) | 3.0118(8)  |
|    | Ag(6)-Ag(28)  | 3.0363(9)  |    | Ag(24)-Ag(25) | 2.9939(8)  |
|    | Ag(7)-Ag(29)  | 3.1036(10) |    | Ag(25)-Ag(26) | 3.3356(9)  |
| 65 | Ag(8)-Ag(20)  | 3.1177(9)  | 90 | Ag(26)-Ag(27) | 3.0167(9)  |
|    | Ag(8)-Ag(9)   | 3.3173(9)  |    | Ag(28)-Ag(29) | 3.0688(11) |
|    | Ag(9)-Ag(21)  | 3.0387(9)  |    | Ag(30)-Ag(31) | 2.855(3)   |
|    | Ag(10)-Ag(13) | 3.0273(9)  |    |               |            |

**Table S4.** Synthesis methods contrasted

|                                                                                                                                                                                                                                                                                | AgS'Bu                  | CF <sub>3</sub> COOAg   | AgNO <sub>3</sub>     | CS <sub>2</sub> | Solvent                                                                                  | Yield |
|--------------------------------------------------------------------------------------------------------------------------------------------------------------------------------------------------------------------------------------------------------------------------------|-------------------------|-------------------------|-----------------------|-----------------|------------------------------------------------------------------------------------------|-------|
| [Ag <sub>31</sub> S <sub>3</sub> (S'Bu) <sub>17</sub> (CF <sub>3</sub> COO) <sub>7</sub> (CO <sub>3</sub> ) <sub>0.5</sub> (CF <sub>3</sub> COOH) <sub>0.5</sub> (DMF) <sub>4</sub> ]·3DMF·CH <sub>3</sub> OH<br>(Compound 1, Ag <sub>31</sub> S <sub>20</sub> -DMF for short) | 0.0653 g<br>0.3314 mmol | 0.0293 g<br>0.1327 mmol | –                     | –               | CH <sub>3</sub> OH-DMF-CH <sub>2</sub> Cl <sub>2</sub><br>(V : V : V=1 : 1 : 1)<br>15 mL | 35%   |
| [Ag <sub>31</sub> S <sub>3</sub> (S'Bu) <sub>16</sub> (NO <sub>3</sub> ) <sub>9</sub> ] <sub>n</sub><br>(ref. 15a, Ag <sub>31</sub> S <sub>19</sub> -NO <sub>3</sub> for short)                                                                                                | 0.0197 g<br>0.1 mmol    | –                       | 0.0204 g<br>0.12 mmol | 0.5 mL          | CH <sub>3</sub> OH-CH <sub>3</sub> CN<br>(V : V=1 : 1)<br>6 mL                           | 40%   |
| Ag <sub>31</sub> S <sub>3</sub> (S'Bu) <sub>17</sub> (CF <sub>3</sub> COO) <sub>8</sub> (CH <sub>3</sub> CN) <sub>4</sub><br>(ref. 15b, Ag <sub>31</sub> S <sub>20</sub> -CH <sub>3</sub> CN for short)                                                                        | 0.1449 g<br>0.7355 mmol | 0.0810 g<br>0.367 mmol  | –                     | –               | CH <sub>3</sub> OH-CH <sub>3</sub> CN<br>(V : V=1 : 1)<br>6 mL                           | 63%   |

Notes: “–” indicates it has not been involved.

**Table S5.** The type of auxiliary ligands and their optical properties

|                                                                                                                                                                                                                                                                                | Auxiliary ligand<br>(number)                                                                                     | Emission wavelength             | Absorption wavelength | Band gap |
|--------------------------------------------------------------------------------------------------------------------------------------------------------------------------------------------------------------------------------------------------------------------------------|------------------------------------------------------------------------------------------------------------------|---------------------------------|-----------------------|----------|
| [Ag <sub>31</sub> S <sub>3</sub> (S'Bu) <sub>17</sub> (CF <sub>3</sub> COO) <sub>7</sub> (CO <sub>3</sub> ) <sub>0.5</sub> (CF <sub>3</sub> COOH) <sub>0.5</sub> (DMF) <sub>4</sub> ]·3DMF·CH <sub>3</sub> OH<br>(Compound 1, Ag <sub>31</sub> S <sub>20</sub> -DMF for short) | CF <sub>3</sub> COO <sup>-</sup> (7)<br>DMF (4)<br>CO <sub>3</sub> <sup>2-</sup> /CF <sub>3</sub> COOH (0.5:0.5) | 648 nm (77K)<br>631 nm (298K)   | 357 nm                | 2.40 eV  |
| [Ag <sub>31</sub> S <sub>3</sub> (S'Bu) <sub>16</sub> (NO <sub>3</sub> ) <sub>9</sub> ] <sub>n</sub><br>(ref. 15a, Ag <sub>31</sub> S <sub>19</sub> -NO <sub>3</sub> for short)                                                                                                | NO <sub>3</sub> <sup>-</sup> (9)                                                                                 | ~675 nm (77K)<br>~590 nm (298K) | ~380 nm               | –        |
| Ag <sub>31</sub> S <sub>3</sub> (S'Bu) <sub>17</sub> (CF <sub>3</sub> COO) <sub>8</sub> (CH <sub>3</sub> CN) <sub>4</sub><br>(ref. 15b, Ag <sub>31</sub> S <sub>20</sub> -CH <sub>3</sub> CN for short)                                                                        | CF <sub>3</sub> COO <sup>-</sup> (8)<br>CH <sub>3</sub> CN (4)                                                   | –                               | –                     | 2.50 eV  |

5 Notes: “–” indicates it has not been involved.

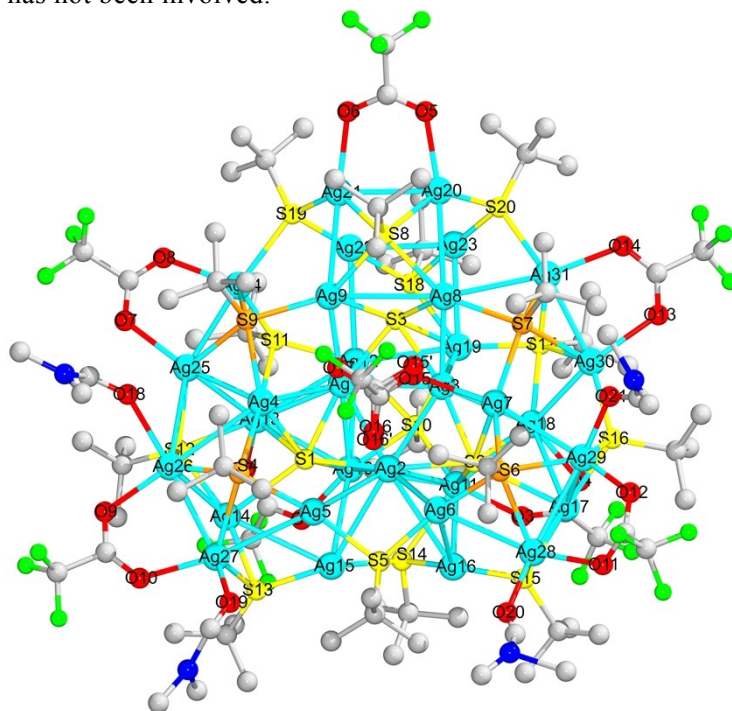

**Figure S1.** Atomic label of the [Ag<sub>31</sub>S<sub>3</sub>(S'Bu)<sub>17</sub>(CF<sub>3</sub>COO)<sub>7</sub>(CO<sub>3</sub>)<sub>0.5</sub>(CF<sub>3</sub>COOH)<sub>0.5</sub>(DMF)<sub>4</sub>] cluster. Color code: Ag, turquoise; S, yellow, orange; C, gray-50%; N, blue; O, red; F, bright green.

### 3. Physical Measurements

The FT-IR spectra were recorded from KBr pellets in the range of 4000–400  $\text{cm}^{-1}$  on a Mattson Alpha-Centauri spectrometer. PXRD patterns were recorded on a Siemens D 5005 diffractometer with  $\text{Cu-K}\alpha$  ( $\lambda = 1.5418 \text{ \AA}$ ) radiation in the range of 3–50  $^{\circ}\text{C}$ . TGA was performed on a Q600 analyzer heated from room temperature to 900  $^{\circ}\text{C}$  under 5 nitrogen gas with a heating rate of 10  $^{\circ}\text{C}/\text{min}$ . Mass spectra were carried out on a Bruker Daltonics flex Analysis instrument. NMR data were recorded on an AVANCE III HD 400MHz Digital NMR Spectrometer. The UV-Vis absorption spectroscopy and diffuse reflectivity were measured on an UV-3600 UV-VIS-NIR spectrophotometer.

The IR band at 3445  $\text{cm}^{-1}$  is due to the O–H vibration; the band at 2954  $\text{cm}^{-1}$  is due to the C–H vibration; the band at 1678  $\text{cm}^{-1}$  is ascribed to the C=O vibration; the band at 1454  $\text{cm}^{-1}$  is attributed to the C–N vibration; the band at 1364  $\text{cm}^{-1}$  is attributed to the C–F vibration; the bands at 1221 and 1158  $\text{cm}^{-1}$  confirmed the presence of the C–S group, and the band at 838  $\text{cm}^{-1}$  is attributed to the N–H vibration.

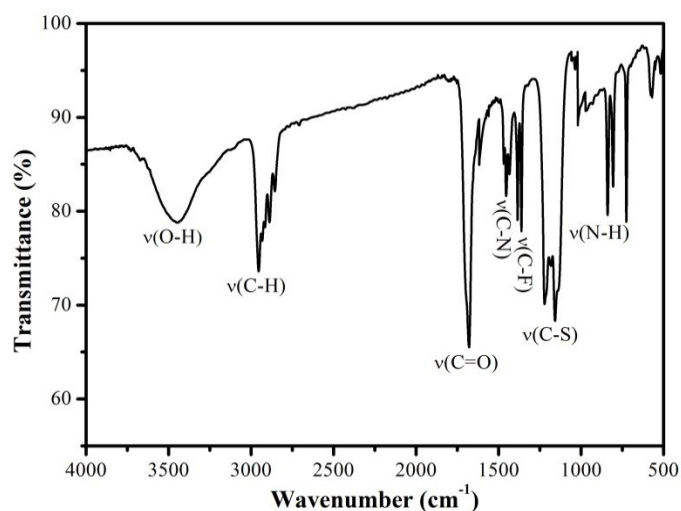

Figure S2. The IR spectrum of **1**

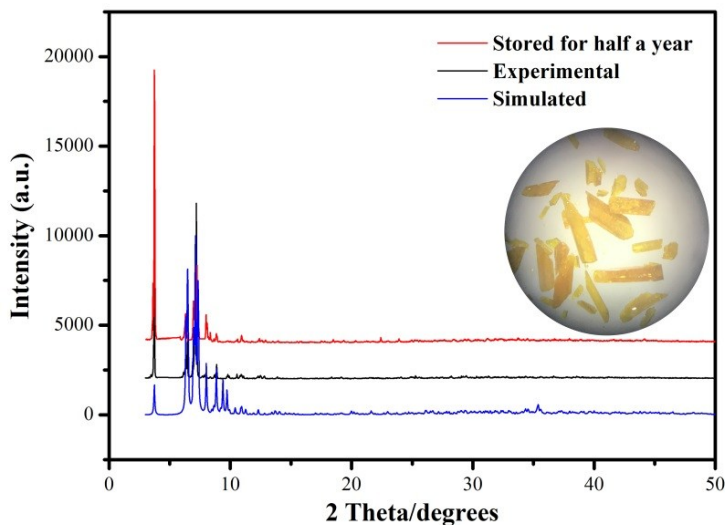

Figure S3. X-ray powder diffraction patterns of **1**, insert: the crystal photo of **1** stored for half a year.

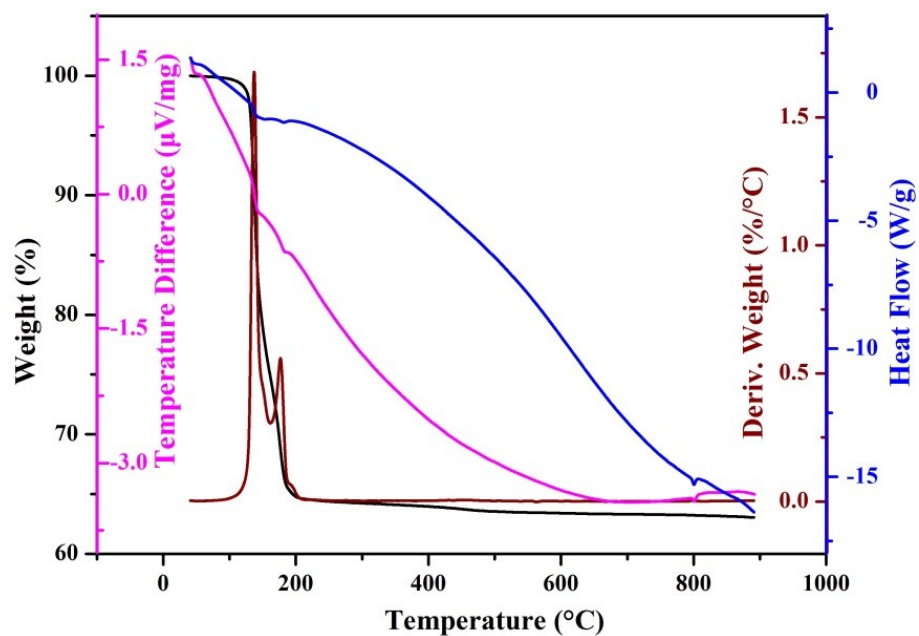

Figure S4. TGA/DSC curve of **1** (in N<sub>2</sub>)

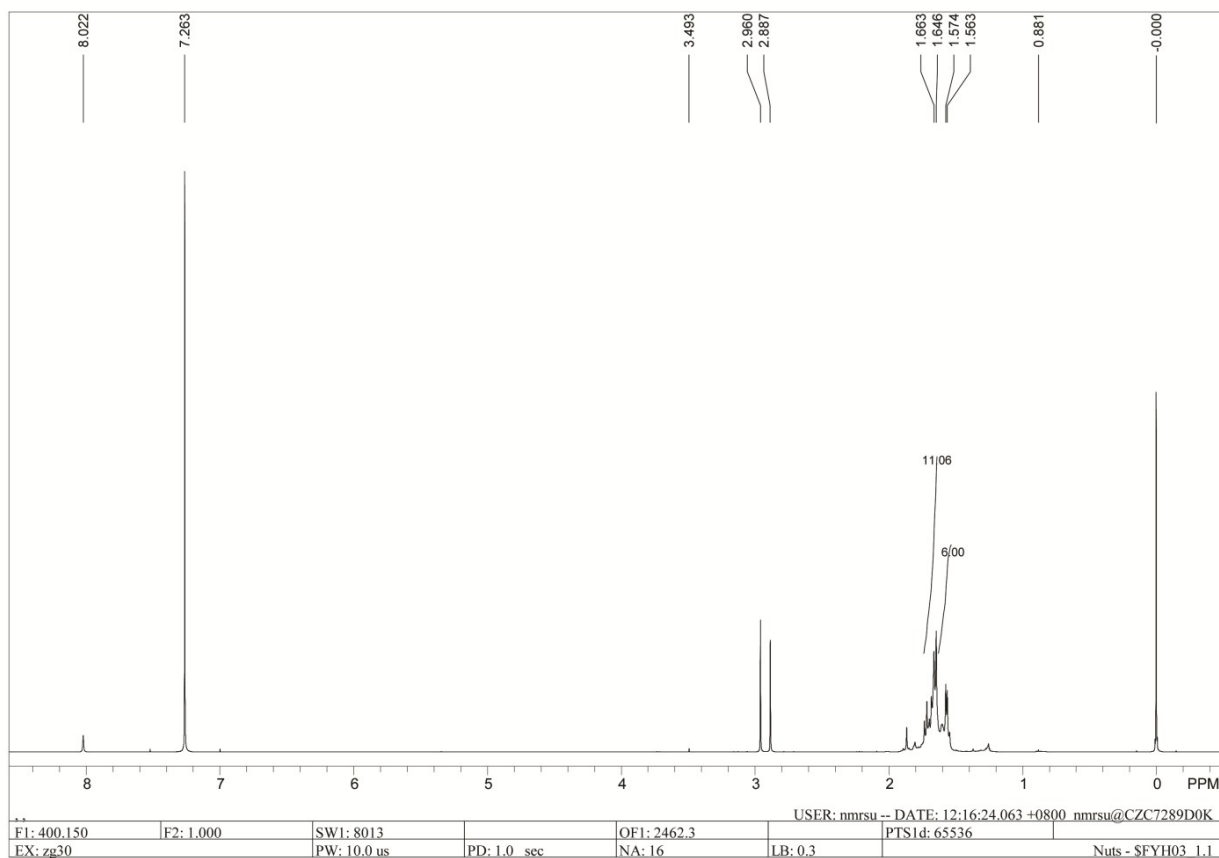

Figure S5. <sup>1</sup>H NMR spectrum of **1** (400MHz, CDCl<sub>3</sub>, RT)

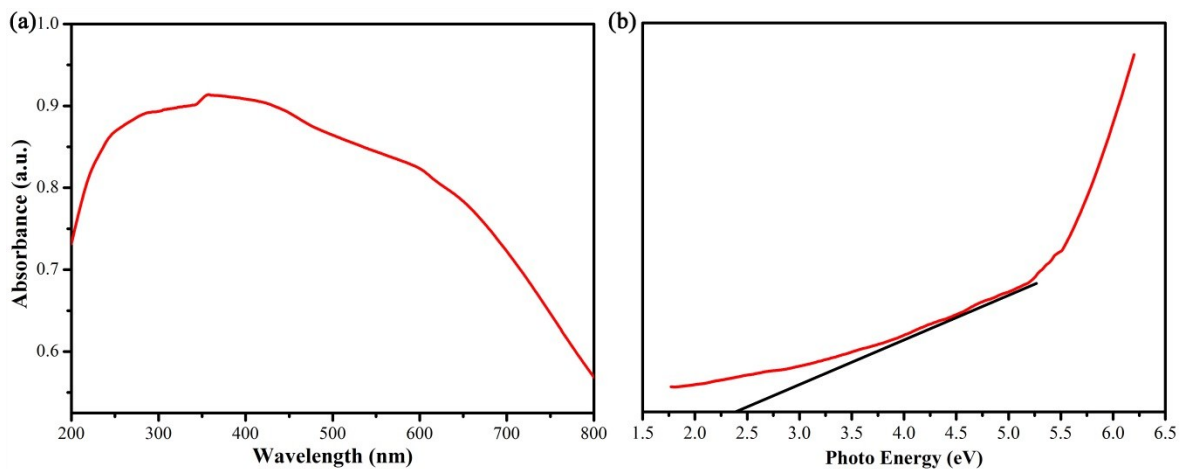

**Figure S6.** (a) Electronic absorption spectrum of compound **1**; (b) Diffuse reflectance spectrum of compound **1** (Band gap: 2.40 eV).

5

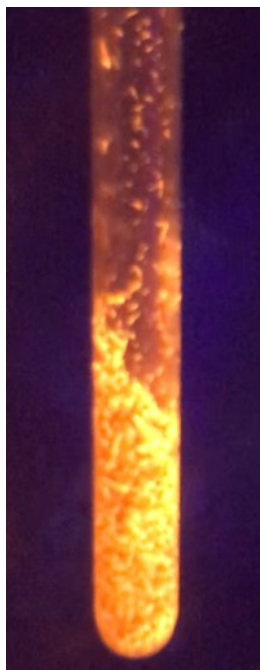

**Figure S7.** The photograph of the luminescence of **1** taken at 77 K (soaked in liquid nitrogen) excited with a hand-held UV lamp (365 nm).

**Reference:**

- 10 1 G. Li, Z. Lei, Q.-M. Wang, *J. Am. Chem. Soc.*, 2010, **132**, 17678–17679.
- 2 G. M. Sheldrick, *Acta Crystallogr. A*, 2015, **71**, 3–8.
- 3 A. L. Spek, *Acta Crystallogr. C*, 2015, **71**, 9–18.
